# Supplementary material for: Perinatal outcomes of maternal overweight and obesity in term infants: a population-based cohort study in Canada
Source: PubMed Central journal article supplement (PMC4366803; doi:10.1038/srep09334), 2015-03-20
Supplement: srep09334-s1.pdf [file srep09334-s1.pdf]

## **Supplementary file**

**Title,** Perinatal outcomes of maternal overweight and obesity in term infants: a population-based cohort study in Canada

**Running title,** Maternal BMI and perinatal outcomes

**Authors,** Angela Elena Vinturache<sup>1,2,3</sup>, Sheila McDonald<sup>1,3</sup>, Donna Slater<sup>2,3</sup>, Suzanne Tough<sup>1,3</sup>

### **Affiliations:**

<sup>1</sup>Department of Paediatrics

<sup>2</sup>Department of Physiology & Pharmacology

<sup>3</sup>Alberta Children's Hospital Research Institute for Child and Maternal Health (ACHRI)

Cumming School of Medicine, University of Calgary, Calgary, Alberta, T2N 4N1, Canada

**Corresponding author:** Angela Vinturache  
Department of Paediatrics/Physiology&Pharmacology  
Faculty of Medicine  
University of Calgary  
Child Development Centre  
c/o 2888 Shaganappi Trail NW  
Calgary, AB, T3B 6A8  
*Telephone:* +1 403 955 5975  
*Email:* aevintur@ucalgary.ca

**Table S1. Risk factors for perinatal outcomes (macrosomia, low Apgar score, NICU admission, length of postnatal hospital stay) in term, singleton, low-risk pregnancies**

| <b>Risk Factors</b>                             | <b>aOR</b> | <b>95%CI</b> |
|-------------------------------------------------|------------|--------------|
| <b>Macrosomia</b>                               |            |              |
| Maternal overweight <sup>1</sup>                | 1.5        | 1.1 - 2.1    |
| Maternal obesity <sup>2</sup>                   | 2.1        | 1.3 - 3.2    |
| Ethnicity <sup>3</sup>                          | 2.1        | 1.3 - 3.5    |
| Parity <sup>4</sup>                             | 1.8        | 1.3 - 2.5    |
| History of LGA                                  | 4.9        | 1.8 - 13.3   |
| Gestational age <sup>5</sup>                    | 2.1        | 1.5 - 3.0    |
| <b>Apgar score &lt; 7 at 5min</b>               |            |              |
| Pregnancy complications <sup>6</sup>            | 3.0        | 1.0 - 8.3    |
| Labour induction                                | 0.3        | 0.09 - 0.9   |
| Emergency caesarean section                     | 3.1        | 1.3 - 7.4    |
| Meconium in amniotic fluid                      | 2.7        | 1.1 - 6.4    |
| <b>NICU admission</b>                           |            |              |
| Maternal age <sup>7</sup>                       | 2.0        | 1.3 - 3.1    |
| Parity <sup>8</sup>                             | 1.7        | 1.0 - 2.6    |
| Emergency caesarean section                     | 2.8        | 1.5 - 3.5    |
| Low APGAR score at 5min <sup>9</sup>            | 14.9       | 6.6 - 33.4   |
| Low birth weight <sup>10</sup>                  | 3.3        | 1.2 - 8.9    |
| Resuscitation at birth                          | 2.1        | 1.4 - 3.3    |
| Congenital anomaly                              | 1.8        | 1.0 - 3.3    |
| <b>Length of postnatal hospital stay ≤ 24 h</b> |            |              |
| Maternal overweight <sup>1</sup>                | 1.4        | 1.0 - 2.0    |
| Maternal age <sup>11</sup>                      | 1.5        | 1.1 - 2.1    |

|                                                 |             |                   |
|-------------------------------------------------|-------------|-------------------|
| Parity <sup>2</sup>                             | <b>3.3</b>  | <b>2.5 - 4.4</b>  |
| Vaginal delivery                                | <b>11.9</b> | <b>3.6 - 39.5</b> |
| <b>Length of postnatal hospital stay ≤ 48 h</b> |             |                   |
| Parity <sup>2</sup>                             | <b>2.4</b>  | <b>1.1 - 5.4</b>  |
| Vaginal delivery                                | <b>16.9</b> | <b>7.4 - 38.7</b> |
| NICU admission                                  | <b>0.09</b> | <b>0.02 - 0.3</b> |

<sup>1</sup>Maternal BMI 25.00-29.99 kg/m<sup>2</sup>;

<sup>2</sup>Maternal BMI ≥ 30.00kg/m<sup>2</sup>;

<sup>3</sup>Caucasian ethnicity;

<sup>4</sup>Multiparity;

<sup>5</sup>Gestational age > 41 weeks at delivery;

<sup>6</sup>Pregnancy complications including gestational hypertension, preeclampsia, and gestational diabetes;

<sup>7</sup>Maternal age at delivery ≥ 35 years;

<sup>8</sup>Nulliparity;

<sup>9</sup>Apgar score less than 7 at 5 min;

<sup>10</sup>Birth weight ≤ 2500 g;

<sup>11</sup>Maternal age < 35 years.
